# Supplementary material for: A simulation study of the self-assembly of ABC star terpolymers confined between two parallel surfaces
Source: Royal Society of Chemistry journal article supplement (doi:10.1039/d1sm00271f), 2021-01-01
Supplement: d1sm00271f1.pdf [file d1sm00271f1.pdf]

## Supplementary Information

### A simulation study of self-assembly of ABC star terpolymers confined between two parallel surfaces

Zhiyao Liu, Zheng Wang, Yuhua Yin, Run Jiang, and Baohui Li\*

Table S1 The estimated characteristic length  $L_1$  values as functions of  $x$  ( $x = N_C/N_A$ ,  $N_A = N_B$ ) and  $\lambda$  ( $\lambda = \varepsilon_{AC}/\varepsilon_{AB}$ ,  $\varepsilon_{AC} = \varepsilon_{BC}$ ) for phases listed in Fig. 1.

| $\lambda \backslash x$ | $L_1$ | 2/6  | 3/6  | 4/6  | 5/6  | 6/6  | 7/6  | 8/6  | 9/6 | 10/6 | 11/6 | 12/6 | 13/6 | 14/6 | 15/6 |
|------------------------|-------|------|------|------|------|------|------|------|-----|------|------|------|------|------|------|
| 2.0                    |       | 13.1 | 17.5 | 17.6 | 18.6 | 19.6 | —    | —    | —   | 11.5 | 12.3 | 12.5 | 12.5 | 12.6 | 13.2 |
| 1.0                    |       | 10.5 | 11.2 | 12.6 | 18.8 | 19   | 19.4 | 21.4 | —   | —    | —    | —    | 12.6 | 13.3 | 13.5 |
| 0.5                    |       | 10.4 | 13.9 | 12.3 | 12.1 | 12.2 | 20.6 | 20.2 | 20  | 20.4 | —    | —    | —    | —    | —    |

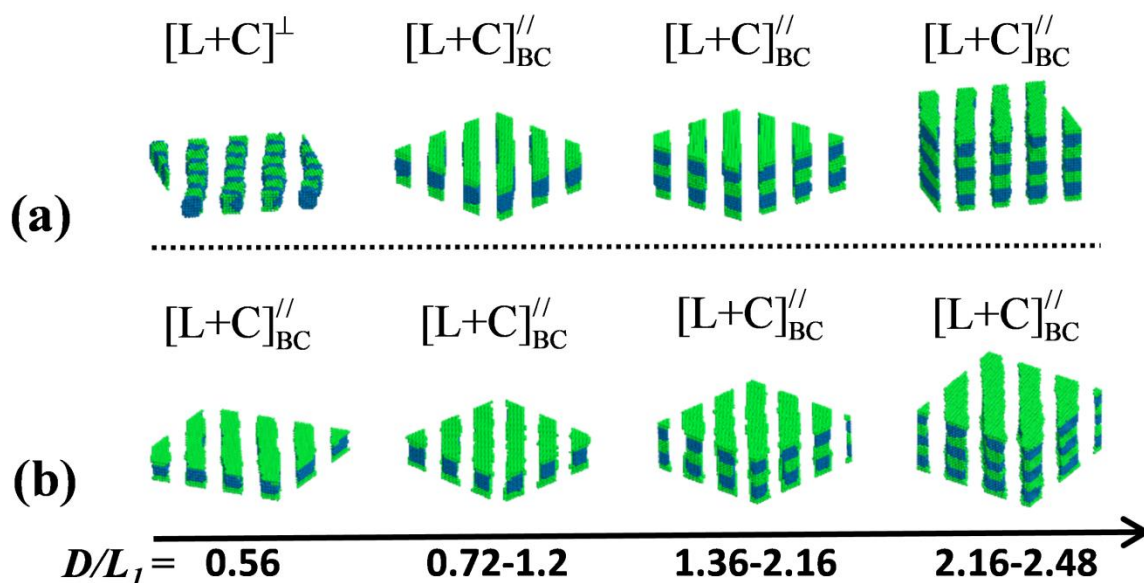

**Fig. S1** Phase sequences as a function of  $D/L_1$  for the bulk  $[L+C]$ -forming star terpolymers  $A_6B_6C_{12}$  with  $\lambda=2$  in the thin films at different surface field: (a)  $\varepsilon_{AS}=1.0$ ,  $\varepsilon_{BS}=0.3$ ,  $\varepsilon_{CS}=0.2$ ; (b)  $\varepsilon_{AS}=1.0$ ,  $\varepsilon_{BS}=0$ ,  $\varepsilon_{CS}=0.5$ . Oblique views of A- and B- domains are shown. Color scheme: A (blue), B (green).

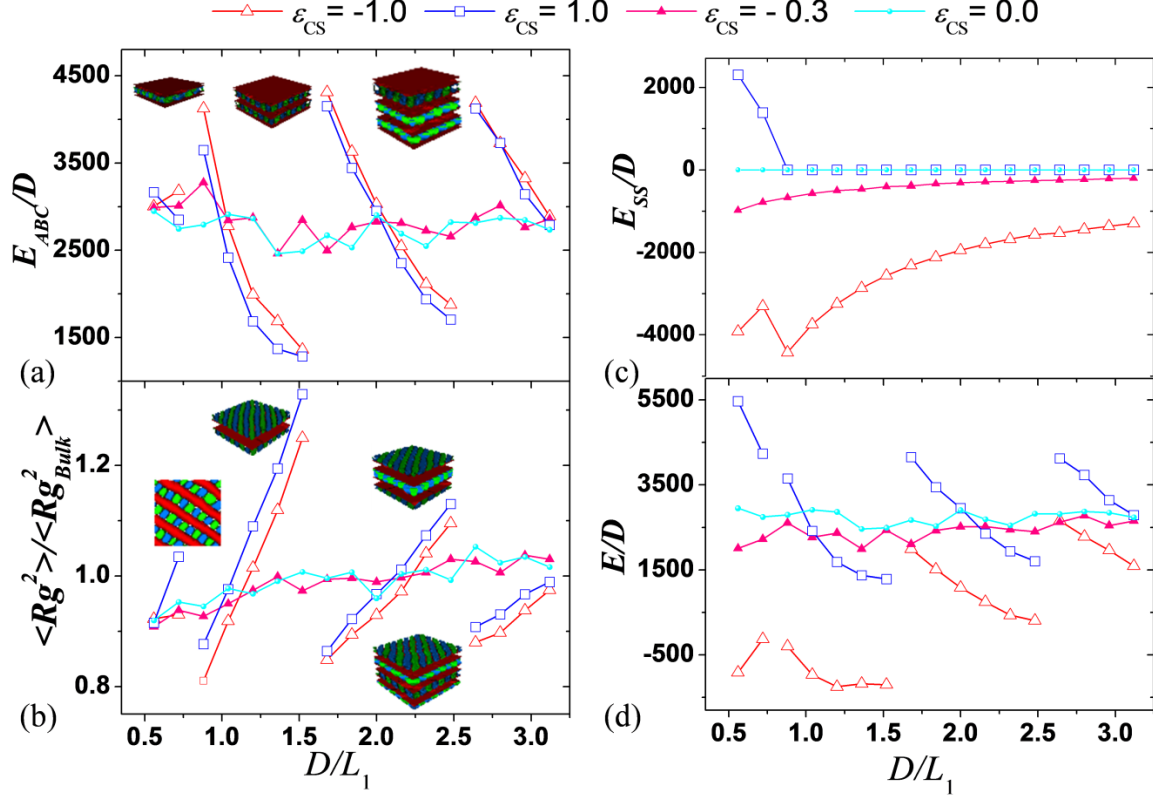

**Fig. S2** Variations of normalized (a) interface energy, (b) mean-square radius of gyration, (c) surface energy and (d) total energy with  $D/L_1$  for terpolymers  $A_6B_6C_{12}$  with  $\lambda = 2$  ( $\epsilon_{AB}=1.0$ ,  $\epsilon_{AC}=\epsilon_{BC}=2.0$ ).  $\langle Rg_{Bulk}^2 \rangle$  is the mean-square radius of gyration for the corresponding bulk phase.  $E_{ABC}/D = (\epsilon_{AB} \times n_{AB} + \epsilon_{AC} \times n_{AC} + \epsilon_{BC} \times n_{BC})/D$ ,  $E_{SS}/D = (\epsilon_{CS} \times n_{CS})/D$ ,  $n_{AB}$ ,  $n_{AC}$ ,  $n_{BC}$  and  $n_{CS}$  are the average of the contact number between segments A and B, A and C, B and C, and surfaces and C, respectively.  $E = E_{SS} + E_{ABC}$ . Some snapshots obtained at  $\epsilon_{CS} = -1.0$  and  $\epsilon_{CS} = 1.0$  are also shown in (a) and (b), respectively.

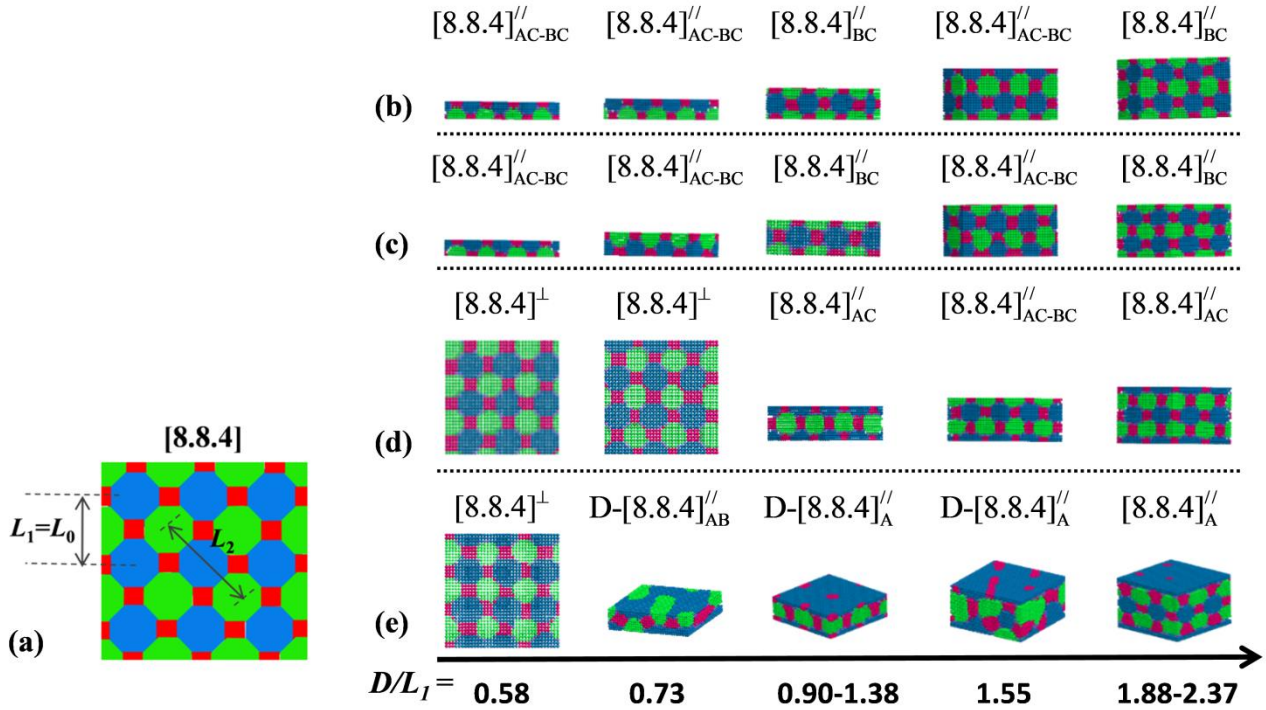

**Fig. S3** (a) A schematic illustration of the characteristic lengths  $L_1$  and  $L_2$  in a  $[8.8.4]$  phase. Phase sequences as a function of  $D/L_1$  for the bulk  $[8.8.4]$ -forming star terpolymers  $A_6B_6C_4$  with  $\lambda=0.5$  in the thin films at different  $\epsilon_{AS}$  values. (b)  $\epsilon_{AS} = 0.2$ , (c)  $\epsilon_{AS} = 0.5$ , (d)  $\epsilon_{AS} = -0.2$ , (e)  $\epsilon_{AS} = -0.5$ . Top view is given for phase  $[8.8.4]^\perp$ , side view is given for parallel phases and oblique view is given for phases with A-wetting layers.

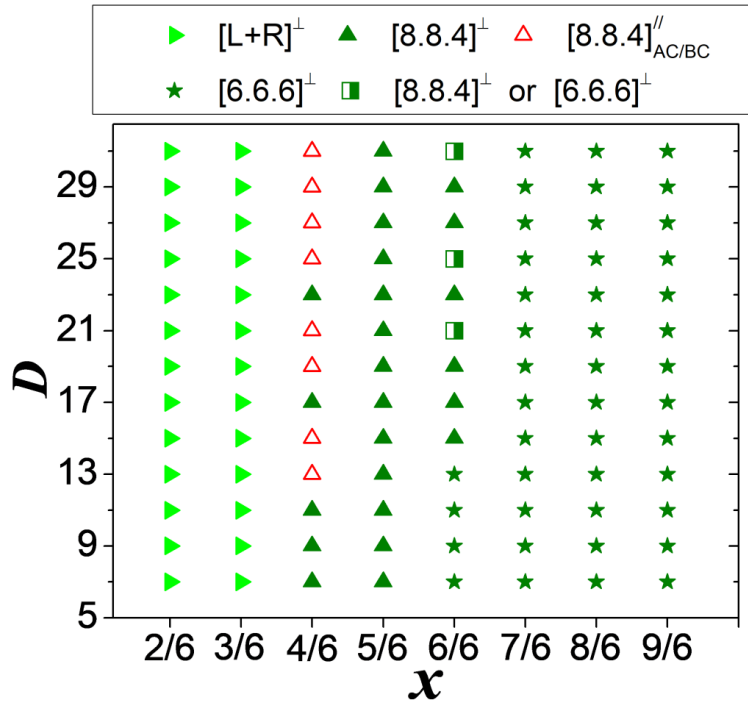

**Fig. S4** Phase diagrams in space of arm length ratio  $x = N_C/N_A$  ( $N_A=N_B$ ) and film thickness  $D$  for ABC star terpolymers with  $\lambda=0.5$  ( $\epsilon_{AC}=\epsilon_{BC}=1.0$ ,  $\epsilon_{AB}=2.0$ ) confined between neutral surfaces.
